# Supplementary material
Source: publisher figshare collection journal article supplement (https://acs.figshare.com/ndownloader/files/4101418)
Supplement: Supplementary file 1 [file 4101418]

#==============================================================================
data_global
#==============================================================================

_publ_contact_author               'Darren J. Dixon'
_publ_contact_author_email          darren.dixon@chem.ox.ac.uk

loop_
_publ_author_name
_publ_author_address
 'Meiling Li'
;    
Chemistry Research Laboratory,
University of Oxford,
Mansfield Road, 
Oxford OX1 3TA. UK.
;
'Swarup Datta'
;    
Chemistry Research Laboratory,
University of Oxford,
Mansfield Road, 
Oxford OX1 3TA. UK.
;
'David M. Barber'
;    
Chemistry Research Laboratory,
University of Oxford,
Mansfield Road, 
Oxford OX1 3TA. UK.
;
'Darren J. Dixon'
;    
Chemistry Research Laboratory,
University of Oxford,
Mansfield Road, 
Oxford OX1 3TA. UK.
darren.dixon@chem.ox.ac.uk
;
_journal_name_full                 
 'Organic Letters'
_journal_volume                    '.'
_journal_page_first                '.'
_journal_page_last                 '.'
_journal_year                      '2012'
_ccdc_journal_depnumber            '.'

_publ_section_title
;
Dual Amine and Palladium Catalysis in Diastereo- and 
Enantioselective Allene Carbocyclization Reactions
;

_publ_section_abstract
;  
A pyrrolidine and palladium catalyzed diastereoselective carbocyclization 
of aldehyde and ketone-linked allenes has been developed. The cooperative 
organo/metal catalyzed cyclization reaction, which presumably proceeds via 
an enamine intermediate, is efficient and broad in scope. Also, it has been 
extended to a catalytic asymmetric variant using diarylprolinol-based 
organocatalysts to afford substituted cyclopentane and pyrrolidine reaction 
products in up to 82% ee.
;

#==============================================================================
data_S22 
#==============================================================================

_audit_creation_date        "12-05-21"
_audit_creation_method CRYSTALS_ver_14.11

_oxford_structure_analysis_title  '006djd11'
_chemical_name_systematic         .
_chemical_melting_point           'not measured'


_cell_length_a                    8.8732(2)
_cell_length_b                    9.6183(2)
_cell_length_c                    25.3162(6)
_cell_angle_alpha                 90
_cell_angle_beta                  90
_cell_angle_gamma                 90
_cell_volume                      2160.61(8)
 
_symmetry_cell_setting            'Orthorhombic' 
_symmetry_space_group_name_H-M    'P 21 21 21 ' 
_symmetry_space_group_name_Hall   'P 2ac 2ab '
loop_
 _symmetry_equiv_pos_as_xyz
 'x,y,z'
 'x+1/2,-y+1/2,-z'
 '-x,y+1/2,-z+1/2'
 '-x+1/2,-y,z+1/2'

loop_
_atom_type_symbol
_atom_type_scat_dispersion_real
_atom_type_scat_dispersion_imag
_atom_type_scat_Cromer_Mann_a1
_atom_type_scat_Cromer_Mann_b1
_atom_type_scat_Cromer_Mann_a2
_atom_type_scat_Cromer_Mann_b2
_atom_type_scat_Cromer_Mann_a3
_atom_type_scat_Cromer_Mann_b3
_atom_type_scat_Cromer_Mann_a4
_atom_type_scat_Cromer_Mann_b4
_atom_type_scat_Cromer_Mann_c
_atom_type_scat_source  
 C       0.0033   0.0016   2.3100  20.8439   1.0200  10.2075   1.5886   0.5687
   0.8650  51.6512   0.2156 'International Tables Vol C 4.2.6.8 and 6.1.1.4'
 H       0.0000   0.0000   0.4930  10.5109   0.3229  26.1257   0.1402   3.1424
   0.0408  57.7998   0.0030 'International Tables Vol C 4.2.6.8 and 6.1.1.4'
 N       0.0061   0.0033  12.2126   0.0057   3.1322   9.8933   2.0125  28.9975
   1.1663   0.5826 -11.5290 'International Tables Vol C 4.2.6.8 and 6.1.1.4'
 O       0.0106   0.0060   3.0485  13.2771   2.2868   5.7011   1.5463   0.3239
   0.8670  32.9089   0.2508 'International Tables Vol C 4.2.6.8 and 6.1.1.4'
 
 
_cell_formula_units_Z                    4

# Given Formula = C22 H27 N1 O7 
# Dc =      1.28 Fooo =    888.00 Mu =      0.96 M =    417.46
# Found Formula = C22 H27 N1 O7 
# Dc =      1.28 FOOO =    888.00 Mu =      0.96 M =    417.46

_chemical_formula_sum             'C22 H27 N1 O7'
_chemical_formula_moiety          'C22 H27 N1 O7'
_chemical_compound_source                .
_chemical_formula_weight            417.46
 
 
_cell_measurement_reflns_used         2704
_cell_measurement_theta_min              5
_cell_measurement_theta_max             27
_cell_measurement_temperature          150
 
_exptl_crystal_description        'block' 
_exptl_crystal_colour             'colourless' 
_exptl_crystal_size_min           0.100 
_exptl_crystal_size_mid           0.120 
_exptl_crystal_size_max           0.600 
 
_exptl_crystal_density_diffrn     1.283 
_exptl_crystal_density_meas       'not measured' 
_exptl_crystal_density_method     'not measured' 
# Non-dispersive F(000): 
_exptl_crystal_F_000              888 
_exptl_absorpt_coefficient_mu     0.096 
 
# Sheldrick geometric approximatio 0.99 0.99 
_exptl_absorpt_correction_type    multi-scan 
_exptl_absorpt_process_details    'DENZO/SCALEPACK (Otwinowski & Minor, 1997)' 
_exptl_absorpt_correction_T_min   0.81 
_exptl_absorpt_correction_T_max   0.99 
# For a Kappa CCD, set Tmin to 1.0 and 
# Tmax to the ratio of max:min frame scales in scale_all.log 
_diffrn_measurement_device_type   'Nonius KappaCCD' 
_diffrn_measurement_device        'Area' 
_diffrn_radiation_monochromator   'graphite' 
_diffrn_radiation_type            'Mo K\a'
_diffrn_radiation_wavelength           0.71073
_diffrn_measurement_method        \w 
 
# If a reference occurs more than once, delete the author 
# and date from subsequent references. 
_computing_data_collection        'COLLECT (Nonius, 2001).' 
_computing_cell_refinement        'DENZO/SCALEPACK (Otwinowski & Minor, 1997)' 
_computing_data_reduction         'DENZO/SCALEPACK (Otwinowski & Minor, 1997)' 
_computing_structure_solution     'SIR92 (Altomare et al., 1994)' 
_computing_structure_refinement   'CRYSTALS (Betteridge et al., 2003)' 
_computing_publication_material   'CRYSTALS (Betteridge et al., 2003)' 
_computing_molecular_graphics     'CAMERON (Watkin et al., 1996)' 
 
_diffrn_standards_interval_time   . 
_diffrn_standards_interval_count  . 
_diffrn_standards_number          0 
_diffrn_standards_decay_%         . 
 
_diffrn_ambient_temperature        150
_diffrn_reflns_number             14638 
_reflns_number_total              2786 
_diffrn_reflns_av_R_equivalents   0.045 
# Number of reflections without Friedels Law is 4856 
# Number of reflections with Friedels Law is 2786 
# Theoretical number of reflections is about 2475 
 
 
_diffrn_reflns_theta_min          5.098 
_diffrn_reflns_theta_max          27.471 
_diffrn_measured_fraction_theta_max 0.985 
 
_diffrn_reflns_theta_full         26.098 
_diffrn_measured_fraction_theta_full 0.987 
 
 
_diffrn_reflns_limit_h_min        -11 
_diffrn_reflns_limit_h_max        11 
_diffrn_reflns_limit_k_min        -12 
_diffrn_reflns_limit_k_max        12 
_diffrn_reflns_limit_l_min        -32 
_diffrn_reflns_limit_l_max        32 
_reflns_limit_h_min               0 
_reflns_limit_h_max               11 
_reflns_limit_k_min               0 
_reflns_limit_k_max               12 
_reflns_limit_l_min               0 
_reflns_limit_l_max               32 
 
_oxford_diffrn_Wilson_B_factor    2.39 
_oxford_diffrn_Wilson_scale       9.68 
 
_atom_sites_solution_primary      direct #heavy,direct,difmap,geom
# _atom_sites_solution_secondary  difmap
_atom_sites_solution_hydrogens    geom
 
_refine_diff_density_min          -0.40 
_refine_diff_density_max          0.40 
 
 
# The current dictionary definitions do not cover the 
# situation where the reflections used for refinement were 
# selected by a user-defined sigma threshold 
 
 
# The values actually used during refinement 
_oxford_reflns_threshold_expression_ref     I>-3.0\s(I)
_refine_ls_number_reflns          2786 
_refine_ls_number_restraints      0 
_refine_ls_number_parameters      271 
_oxford_refine_ls_R_factor_ref    0.0680 
_refine_ls_wR_factor_ref          0.1211 
_refine_ls_goodness_of_fit_ref    0.9568 
_refine_ls_shift/su_max           0.0001184 
_refine_ls_shift/su_mean          0.0000152 
 
 
# The values computed from all data 
_oxford_reflns_number_all         2786 
_refine_ls_R_factor_all           0.0680 
_refine_ls_wR_factor_all          0.1211 
 
# The values computed with a 2 sigma cutoff - a la SHELX 
_reflns_threshold_expression      I>2.0\s(I)
_reflns_number_gt                 2021 
_refine_ls_R_factor_gt            0.0402 
_refine_ls_wR_factor_gt           0.0924 
 
# choose from: rm (reference molecule of known chirality), 
# ad (anomolous dispersion - Flack), rmad (rm and ad), 
# syn (from synthesis), unk (unknown) or . (not applicable). 
_chemical_absolute_configuration  'unk' 
 
 
_refine_ls_structure_factor_coef  Fsqd 
_refine_ls_matrix_type            full
_refine_ls_hydrogen_treatment     none           # none, undef, noref, refall,
                                                 # refxyz, refU, constr or mixed
_refine_ls_weighting_scheme       calc 
_refine_ls_weighting_details 
;
 Method, part 1, Chebychev polynomial, (Watkin, 1994, Prince, 1982) 
 [weight] = 1.0/[A~0~*T~0~(x)+A~1~*T~1~(x) ... +A~n-1~]*T~n-1~(x)] 
 where A~i~ are the Chebychev coefficients listed below and x= Fcalc/Fmax 
 Method = Robust Weighting (Prince, 1982) 
 W = [weight] * [1-(deltaF/6*sigmaF)^2^]^2^ 
 A~i~ are: 
 11.1 16.2 8.13 2.16 
;
# Insert your own references if required - in alphabetical order 
_publ_section_references 
; 
Altomare, A., Cascarano, G., Giacovazzo, C., Guagliardi, A., Burla, M.C., 
Polidori, G. & Camalli, M. (1994). J. Appl. Cryst. 27, 435. 
 
Betteridge, P.W., Carruthers, J.R., Cooper, R.I., 
Prout, K. & Watkin, D.J. (2003). J. Appl. Cryst. 36, 1487. 
 
Nonius (2001). COLLECT. Nonius BV, Delft, The Netherlands. 
 
Otwinowski, Z. & Minor, W. (1997). Methods in Enzymology, Vol. 276, 
edited by C. W. Carter Jr & R. M. Sweet, pp. 307--326. 
New York: Academic Press. 
 
Prince, E. 
Mathematical Techniques in Crystallography 
and Materials Science 
Springer-Verlag, New York, 1982. 
 
Watkin D.J. (1994). 
Acta Cryst, A50, 411-437. 
 
Watkin, D.J., Prout, C.K. & Pearce, L.J. (1996). CAMERON, Chemical 
Crystallography Laboratory, Oxford, UK. 
; 

# Uequiv = arithmetic mean of Ui i.e. Ueqiv = (U1+U2+U3)/3

# Replace last . with number of unfound hydrogen atomsattached to an atom.

# ..._refinement_flags_... 
# . no refinement constraints           S special position constraint on site
# G rigid group refinement of site      R riding atom
# D distance or angle restraint on site T thermal displacement constraints
# U Uiso or Uij restraint (rigid bond)  P partial occupancy constraint


loop_
_atom_site_label
_atom_site_type_symbol
_atom_site_fract_x
_atom_site_fract_y
_atom_site_fract_z
_atom_site_U_iso_or_equiv
_atom_site_occupancy
_atom_site_adp_type
_atom_site_refinement_flags_posn
_atom_site_refinement_flags_adp
_atom_site_refinement_flags_occupancy
_atom_site_disorder_assembly
_atom_site_disorder_group
_atom_site_attached_hydrogens
O1 O -0.0256(3) 0.6869(2) 0.25938(9) 0.0305 1.0000 Uani . . . . . . 
C2 C 0.0094(4) 0.5621(3) 0.26189(12) 0.0219 1.0000 Uani . . . . . . 
N3 N 0.0462(3) 0.4881(3) 0.21918(10) 0.0214 1.0000 Uani . . . . . . 
C4 C 0.0685(4) 0.5512(3) 0.16779(12) 0.0220 1.0000 Uani . . . . . . 
C5 C 0.1991(4) 0.4775(3) 0.13893(13) 0.0267 1.0000 Uani . . . . . . 
C6 C 0.3475(3) 0.4939(3) 0.16721(11) 0.0240 1.0000 Uani . . . . . . 
C7 C 0.4251(4) 0.6196(4) 0.16546(13) 0.0291 1.0000 Uani . . . . . . 
C8 C 0.5609(4) 0.6365(4) 0.19189(14) 0.0338 1.0000 Uani . . . . . . 
C9 C 0.6211(4) 0.5275(4) 0.22047(15) 0.0373 1.0000 Uani . . . . . . 
C10 C 0.5467(4) 0.4015(4) 0.22238(14) 0.0370 1.0000 Uani . . . . . . 
C11 C 0.4104(4) 0.3845(4) 0.19591(14) 0.0319 1.0000 Uani . . . . . . 
C12 C -0.0697(4) 0.5492(3) 0.13230(13) 0.0249 1.0000 Uani . . . . . . 
O13 O -0.1352(3) 0.4246(2) 0.13142(10) 0.0307 1.0000 Uani . . . . . . 
C14 C -0.2609(4) 0.4091(4) 0.09543(15) 0.0356 1.0000 Uani . . . . . . 
O15 O -0.1098(3) 0.6463(3) 0.10588(11) 0.0423 1.0000 Uani . . . . . . 
C16 C 0.0215(4) 0.4884(3) 0.31438(11) 0.0234 1.0000 Uani . . . . . . 
C17 C 0.1369(4) 0.5626(3) 0.35061(12) 0.0233 1.0000 Uani . . . . . . 
C18 C 0.0987(4) 0.5035(4) 0.40502(12) 0.0256 1.0000 Uani . . . . . . 
C19 C -0.0740(4) 0.4951(3) 0.40621(12) 0.0249 1.0000 Uani . . . . . . 
C20 C -0.1253(4) 0.4922(4) 0.34709(12) 0.0256 1.0000 Uani . . . . . . 
C21 C -0.1269(4) 0.3681(4) 0.43700(13) 0.0268 1.0000 Uani . . . . . . 
O22 O -0.0618(3) 0.3682(3) 0.48505(9) 0.0377 1.0000 Uani . . . . . . 
C23 C -0.0962(6) 0.2502(4) 0.51868(16) 0.0484 1.0000 Uani . . . . . . 
O24 O -0.2137(3) 0.2812(3) 0.42239(10) 0.0385 1.0000 Uani . . . . . . 
C25 C -0.1444(4) 0.6223(4) 0.43245(13) 0.0282 1.0000 Uani . . . . . . 
O26 O -0.2934(3) 0.6058(3) 0.43616(11) 0.0400 1.0000 Uani . . . . . . 
C27 C -0.3790(5) 0.7233(5) 0.45582(17) 0.0474 1.0000 Uani . . . . . . 
O28 O -0.0778(3) 0.7256(3) 0.44565(11) 0.0409 1.0000 Uani . . . . . . 
C29 C 0.2964(4) 0.5478(4) 0.33273(14) 0.0297 1.0000 Uani . . . . . . 
C30 C 0.4117(4) 0.5047(4) 0.36154(16) 0.0387 1.0000 Uani . . . . . . 
H41 H 0.0970 0.6496 0.1744 0.0253 1.0000 Uiso R . . . . . 
H52 H 0.2079 0.5220 0.1037 0.0348 1.0000 Uiso R . . . . . 
H51 H 0.1739 0.3787 0.1351 0.0339 1.0000 Uiso R . . . . . 
H71 H 0.3845 0.6950 0.1460 0.0327 1.0000 Uiso R . . . . . 
H81 H 0.6133 0.7211 0.1908 0.0421 1.0000 Uiso R . . . . . 
H91 H 0.7132 0.5366 0.2393 0.0513 1.0000 Uiso R . . . . . 
H101 H 0.5882 0.3250 0.2415 0.0430 1.0000 Uiso R . . . . . 
H111 H 0.3582 0.2986 0.1971 0.0354 1.0000 Uiso R . . . . . 
H141 H -0.2932 0.3137 0.0965 0.0550 1.0000 Uiso R . . . . . 
H142 H -0.2245 0.4354 0.0600 0.0557 1.0000 Uiso R . . . . . 
H143 H -0.3439 0.4690 0.1061 0.0553 1.0000 Uiso R . . . . . 
H161 H 0.0545 0.3923 0.3099 0.0289 1.0000 Uiso R . . . . . 
H171 H 0.1128 0.6631 0.3505 0.0271 1.0000 Uiso R . . . . . 
H181 H 0.1436 0.4094 0.4097 0.0294 1.0000 Uiso R . . . . . 
H182 H 0.1424 0.5625 0.4320 0.0291 1.0000 Uiso R . . . . . 
H201 H -0.1847 0.4077 0.3399 0.0343 1.0000 Uiso R . . . . . 
H202 H -0.1860 0.5744 0.3391 0.0340 1.0000 Uiso R . . . . . 
H232 H -0.0379 0.2589 0.5508 0.0720 1.0000 Uiso R . . . . . 
H231 H -0.0724 0.1627 0.5020 0.0713 1.0000 Uiso R . . . . . 
H233 H -0.2009 0.2512 0.5266 0.0710 1.0000 Uiso R . . . . . 
H272 H -0.4798 0.6906 0.4611 0.0757 1.0000 Uiso R . . . . . 
H271 H -0.3815 0.7996 0.4310 0.0749 1.0000 Uiso R . . . . . 
H273 H -0.3404 0.7571 0.4884 0.0756 1.0000 Uiso R . . . . . 
H291 H 0.3195 0.5769 0.2972 0.0356 1.0000 Uiso R . . . . . 
H301 H 0.5048 0.4978 0.3468 0.0460 1.0000 Uiso R . . . . . 
H302 H 0.3999 0.4800 0.3974 0.0460 1.0000 Uiso R . . . . . 
H31 H 0.0449 0.4000 0.2218 0.0260 1.0000 Uiso R . . . . . 
loop_
_atom_site_aniso_label
_atom_site_aniso_U_11
_atom_site_aniso_U_22
_atom_site_aniso_U_33
_atom_site_aniso_U_23
_atom_site_aniso_U_13
_atom_site_aniso_U_12
O1 0.0423(15) 0.0200(10) 0.0292(12) -0.0013(9) 0.0017(11) 0.0057(10) 
C2 0.0241(16) 0.0185(14) 0.0232(15) 0.0020(12) -0.0024(13) -0.0012(13) 
N3 0.0275(14) 0.0168(11) 0.0200(11) 0.0007(10) 0.0029(10) 0.0027(11) 
C4 0.0217(15) 0.0210(13) 0.0233(14) 0.0014(12) -0.0001(13) -0.0031(12) 
C5 0.0251(15) 0.0294(17) 0.0256(15) -0.0020(13) 0.0027(13) 0.0002(14) 
C6 0.0228(15) 0.0291(15) 0.0203(13) -0.0041(13) 0.0036(12) 0.0023(14) 
C7 0.0273(16) 0.0287(16) 0.0313(16) 0.0020(14) 0.0004(14) 0.0036(14) 
C8 0.0260(17) 0.0324(17) 0.043(2) -0.0061(16) 0.0028(16) -0.0011(15) 
C9 0.0249(17) 0.052(2) 0.0351(18) -0.0043(17) -0.0029(15) 0.0010(17) 
C10 0.0320(19) 0.046(2) 0.0329(18) 0.0084(16) -0.0001(15) 0.0078(18) 
C11 0.0300(18) 0.0294(17) 0.0362(18) 0.0043(14) -0.0005(15) -0.0018(16) 
C12 0.0226(15) 0.0270(15) 0.0251(15) 0.0021(13) 0.0025(13) -0.0003(13) 
O13 0.0287(12) 0.0281(12) 0.0353(13) 0.0003(10) -0.0094(11) -0.0005(10) 
C14 0.0319(19) 0.0382(19) 0.0366(19) -0.0051(16) -0.0097(15) -0.0022(16) 
O15 0.0405(15) 0.0364(14) 0.0500(16) 0.0194(12) -0.0171(13) -0.0047(12) 
C16 0.0252(16) 0.0228(14) 0.0221(13) -0.0013(13) -0.0017(12) 0.0020(14) 
C17 0.0233(15) 0.0221(14) 0.0245(15) 0.0005(12) -0.0034(13) -0.0018(13) 
C18 0.0274(16) 0.0263(15) 0.0232(14) -0.0004(13) -0.0032(13) 0.0004(14) 
C19 0.0257(16) 0.0276(15) 0.0213(14) -0.0045(13) -0.0007(12) 0.0003(14) 
C20 0.0244(15) 0.0319(16) 0.0206(14) 0.0002(13) -0.0021(12) -0.0002(15) 
C21 0.0254(16) 0.0316(16) 0.0235(15) -0.0016(13) 0.0030(13) 0.0034(15) 
O22 0.0496(16) 0.0399(14) 0.0234(11) 0.0070(11) -0.0031(11) -0.0087(13) 
C23 0.060(3) 0.046(2) 0.039(2) 0.0165(19) 0.001(2) -0.002(2) 
O24 0.0420(15) 0.0326(13) 0.0408(14) -0.0009(11) -0.0015(13) -0.0112(13) 
C25 0.0319(17) 0.0321(18) 0.0205(14) 0.0013(14) -0.0038(14) 0.0069(15) 
O26 0.0310(13) 0.0445(15) 0.0446(15) -0.0114(13) 0.0070(12) 0.0064(13) 
C27 0.049(3) 0.050(2) 0.043(2) -0.0058(19) 0.0049(19) 0.020(2) 
O28 0.0444(15) 0.0322(13) 0.0462(15) -0.0108(12) -0.0089(13) 0.0035(13) 
C29 0.0267(16) 0.0330(17) 0.0296(16) 0.0023(14) -0.0002(14) -0.0027(15) 
C30 0.0264(17) 0.047(2) 0.0431(19) 0.0027(19) -0.0015(16) -0.0015(18) 

_refine_ls_extinction_method 
    'None'
_oxford_refine_ls_scale 0.3271(5) 
loop_
 _geom_bond_atom_site_label_1
 _geom_bond_site_symmetry_1
 _geom_bond_atom_site_label_2
 _geom_bond_site_symmetry_2
 _geom_bond_distance
 _geom_bond_publ_flag
O1 . C2 . 1.241(4)    yes
C2 . N3 . 1.335(4)    yes
C2 . C16 . 1.510(4)    yes
N3 . C4 . 1.449(4)    yes
N3 . H31 . 0.850    no
C4 . C5 . 1.542(4)    yes
C4 . C12 . 1.520(4)    yes
C4 . H41 . 0.994    no
C5 . C6 . 1.507(4)    yes
C5 . H52 . 0.992    no
C5 . H51 . 0.982    no
C6 . C7 . 1.393(5)    yes
C6 . C11 . 1.395(5)    yes
C7 . C8 . 1.388(5)    yes
C7 . H71 . 0.948    no
C8 . C9 . 1.381(5)    yes
C8 . H81 . 0.937    no
C9 . C10 . 1.381(5)    yes
C9 . H91 . 0.950    no
C10 . C11 . 1.392(5)    yes
C10 . H101 . 0.954    no
C11 . H111 . 0.948    no
C12 . O13 . 1.332(4)    yes
C12 . O15 . 1.203(4)    yes
O13 . C14 . 1.448(4)    yes
C14 . H141 . 0.961    no
C14 . H142 . 0.987    no
C14 . H143 . 0.974    no
C16 . C17 . 1.548(4)    yes
C16 . C20 . 1.544(4)    yes
C16 . H161 . 0.976    no
C17 . C18 . 1.528(4)    yes
C17 . C29 . 1.493(5)    yes
C17 . H171 . 0.990    no
C18 . C19 . 1.535(5)    yes
C18 . H181 . 0.996    no
C18 . H182 . 0.969    no
C19 . C20 . 1.565(4)    yes
C19 . C21 . 1.524(5)    yes
C19 . C25 . 1.526(5)    yes
C20 . H201 . 0.986    no
C20 . H202 . 0.977    no
C21 . O22 . 1.346(4)    yes
C21 . O24 . 1.196(4)    yes
O22 . C23 . 1.451(4)    yes
C23 . H232 . 0.967    no
C23 . H231 . 0.965    no
C23 . H233 . 0.951    no
C25 . O26 . 1.335(4)    yes
C25 . O28 . 1.203(4)    yes
O26 . C27 . 1.450(5)    yes
C27 . H272 . 0.957    no
C27 . H271 . 0.966    no
C27 . H273 . 0.951    no
C29 . C30 . 1.323(5)    yes
C29 . H291 . 0.964    no
C30 . H301 . 0.909    no
C30 . H302 . 0.944    no
loop_
 _geom_angle_atom_site_label_1
 _geom_angle_site_symmetry_1
 _geom_angle_atom_site_label_2
 _geom_angle_site_symmetry_2
 _geom_angle_atom_site_label_3
 _geom_angle_site_symmetry_3
 _geom_angle
 _geom_angle_publ_flag
O1 . C2 . N3 . 122.4(3)    yes
O1 . C2 . C16 . 121.1(3)    yes
N3 . C2 . C16 . 116.4(2)    yes
C2 . N3 . C4 . 122.5(3)    yes
C2 . N3 . H31 . 117.6    no
C4 . N3 . H31 . 119.4    no
N3 . C4 . C5 . 109.6(3)    yes
N3 . C4 . C12 . 114.5(3)    yes
C5 . C4 . C12 . 108.7(3)    yes
N3 . C4 . H41 . 106.4    no
C5 . C4 . H41 . 109.0    no
C12 . C4 . H41 . 108.4    no
C4 . C5 . C6 . 112.6(3)    yes
C4 . C5 . H52 . 106.7    no
C6 . C5 . H52 . 108.3    no
C4 . C5 . H51 . 108.7    no
C6 . C5 . H51 . 110.3    no
H52 . C5 . H51 . 110.3    no
C5 . C6 . C7 . 120.5(3)    yes
C5 . C6 . C11 . 121.2(3)    yes
C7 . C6 . C11 . 118.3(3)    yes
C6 . C7 . C8 . 121.0(3)    yes
C6 . C7 . H71 . 119.5    no
C8 . C7 . H71 . 119.4    no
C7 . C8 . C9 . 120.0(3)    yes
C7 . C8 . H81 . 121.1    no
C9 . C8 . H81 . 118.9    no
C8 . C9 . C10 . 120.0(3)    yes
C8 . C9 . H91 . 121.7    no
C10 . C9 . H91 . 118.3    no
C9 . C10 . C11 . 120.1(3)    yes
C9 . C10 . H101 . 120.7    no
C11 . C10 . H101 . 119.2    no
C6 . C11 . C10 . 120.7(3)    yes
C6 . C11 . H111 . 118.6    no
C10 . C11 . H111 . 120.8    no
C4 . C12 . O13 . 111.9(3)    yes
C4 . C12 . O15 . 123.9(3)    yes
O13 . C12 . O15 . 124.1(3)    yes
C12 . O13 . C14 . 116.1(3)    yes
O13 . C14 . H141 . 108.1    no
O13 . C14 . H142 . 107.1    no
H141 . C14 . H142 . 111.5    no
O13 . C14 . H143 . 110.2    no
H141 . C14 . H143 . 109.4    no
H142 . C14 . H143 . 110.4    no
C2 . C16 . C17 . 110.6(3)    yes
C2 . C16 . C20 . 113.6(3)    yes
C17 . C16 . C20 . 103.3(2)    yes
C2 . C16 . H161 . 111.3    no
C17 . C16 . H161 . 107.9    no
C20 . C16 . H161 . 109.8    no
C16 . C17 . C18 . 102.5(2)    yes
C16 . C17 . C29 . 113.8(3)    yes
C18 . C17 . C29 . 116.6(3)    yes
C16 . C17 . H171 . 107.8    no
C18 . C17 . H171 . 108.6    no
C29 . C17 . H171 . 107.3    no
C17 . C18 . C19 . 105.0(3)    yes
C17 . C18 . H181 . 110.9    no
C19 . C18 . H181 . 110.5    no
C17 . C18 . H182 . 109.2    no
C19 . C18 . H182 . 114.6    no
H181 . C18 . H182 . 106.7    no
C18 . C19 . C20 . 105.8(3)    yes
C18 . C19 . C21 . 111.1(3)    yes
C20 . C19 . C21 . 112.7(3)    yes
C18 . C19 . C25 . 112.0(3)    yes
C20 . C19 . C25 . 108.2(3)    yes
C21 . C19 . C25 . 107.1(3)    yes
C16 . C20 . C19 . 105.6(2)    yes
C16 . C20 . H201 . 109.4    no
C19 . C20 . H201 . 110.3    no
C16 . C20 . H202 . 111.9    no
C19 . C20 . H202 . 110.1    no
H201 . C20 . H202 . 109.5    no
C19 . C21 . O22 . 109.2(3)    yes
C19 . C21 . O24 . 126.9(3)    yes
O22 . C21 . O24 . 123.8(3)    yes
C21 . O22 . C23 . 116.1(3)    yes
O22 . C23 . H232 . 108.3    no
O22 . C23 . H231 . 112.3    no
H232 . C23 . H231 . 109.0    no
O22 . C23 . H233 . 108.8    no
H232 . C23 . H233 . 110.1    no
H231 . C23 . H233 . 108.3    no
C19 . C25 . O26 . 109.9(3)    yes
C19 . C25 . O28 . 125.6(3)    yes
O26 . C25 . O28 . 124.4(3)    yes
C25 . O26 . C27 . 116.7(3)    yes
O26 . C27 . H272 . 106.4    no
O26 . C27 . H271 . 112.4    no
H272 . C27 . H271 . 108.6    no
O26 . C27 . H273 . 112.0    no
H272 . C27 . H273 . 109.1    no
H271 . C27 . H273 . 108.2    no
C17 . C29 . C30 . 126.6(3)    yes
C17 . C29 . H291 . 117.2    no
C30 . C29 . H291 . 116.2    no
C29 . C30 . H301 . 120.0    no
C29 . C30 . H302 . 121.5    no
H301 . C30 . H302 . 118.5    no
loop_
 _geom_hbond_atom_site_label_D
 _geom_hbond_site_symmetry_D
 _geom_hbond_atom_site_label_H
 _geom_hbond_site_symmetry_H
 _geom_hbond_atom_site_label_A
 _geom_hbond_site_symmetry_A
 _geom_hbond_angle_DHA
 _geom_hbond_distance_DH
 _geom_hbond_distance_HA
 _geom_hbond_distance_DA
 _geom_hbond_publ_flag
C5 . H52 . O24 3_555 130 0.99 2.58 3.310(5)    yes
C7 . H71 . O24 3_555 150 0.95 2.45 3.298(5)    yes
C17 . H171 . O13 3_555 160 0.99 2.56 3.511(5)    yes
C18 . H181 . O15 3_545 146 1.00 2.58 3.448(5)    yes
N3 . H31 . O1 3_545 171 0.85 2.11 2.953(5)    yes


_iucr_refine_instruction_details_constraints
;
#
# Punched on 21/05/12 at 13:49:01
#
#LIST     12                                                                    
BLOCK SCALE X'S, U'S 
RIDE N   (   3,X'S) H   (  31,X'S) 
RIDE C   (   4,X'S) H   (  41,X'S) 
RIDE C   (   5,X'S) H   (  52,X'S) H   (  51,X'S) 
RIDE C   (   7,X'S) H   (  71,X'S) 
RIDE C   (   8,X'S) H   (  81,X'S) 
RIDE C   (   9,X'S) H   (  91,X'S) 
RIDE C   (  10,X'S) H   ( 101,X'S) 
RIDE C   (  11,X'S) H   ( 111,X'S) 
RIDE C   (  14,X'S) H   ( 141,X'S) H   ( 142,X'S) H   ( 143,X'S) 
RIDE C   (  16,X'S) H   ( 161,X'S) 
RIDE C   (  17,X'S) H   ( 171,X'S) 
RIDE C   (  18,X'S) H   ( 181,X'S) H   ( 182,X'S) 
RIDE C   (  20,X'S) H   ( 201,X'S) H   ( 202,X'S) 
RIDE C   (  23,X'S) H   ( 232,X'S) H   ( 231,X'S) H   ( 233,X'S) 
RIDE C   (  27,X'S) H   ( 272,X'S) H   ( 271,X'S) H   ( 273,X'S) 
RIDE C   (  29,X'S) H   ( 291,X'S) 
RIDE C   (  30,X'S) H   ( 301,X'S) H   ( 302,X'S) 
END                                                                             
;


_iucr_refine_instruction_details_restraints
;
#
# Punched on 21/05/12 at 13:49:01
#
#LIST     16                                                                    
NO 
REM   HREST   START (DO NOT REMOVE THIS LINE) 
REM   HREST   END (DO NOT REMOVE THIS LINE) 
END                                                                             
;
